# Supplementary material for: Feasibility and Usability of a Mobile App–Based Interactive Care Plan for Migraine in a Community Neurology Practice: Development and Pilot Implementation Study
Source: PubMed Central journal article supplement (PMC10587810; doi:10.2196/48372), 2023-10-05
Supplement: formative_v7i1e48372_app1.pdf [file formative_v7i1e48372_app1.pdf]

# General Neurology/Primary Care Migraine Delivery Process

8/23/2019

| Assessments | <p><b>Day 1</b><br/> <b>Migraine management satisfaction</b><br/>                 Repeat day 30 and every 30 after until 1 year</p> | <p><b>Day 1</b><br/> <b>Migraine Disability Assessment (MIDAS)</b><br/>                 Repeat day 90 and every 90 after until 1 year</p>       | <p><b>Day 90</b><br/> <b>Continue on care plan</b><br/>                 Repeat day 90 and every 90 after until 1 year</p>                     |                                                                                                                          |
|-------------|-------------------------------------------------------------------------------------------------------------------------------------|-------------------------------------------------------------------------------------------------------------------------------------------------|-----------------------------------------------------------------------------------------------------------------------------------------------|--------------------------------------------------------------------------------------------------------------------------|
| Weekly      | 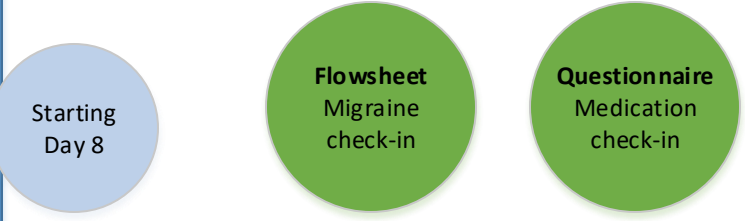                                                   |                                                                                                                                                 |                                                                                                                                               |                                                                                                                          |
| Education   | <p><b>Day 1 Education</b><br/>                 Welcome to the Mayo Clinic Care Plan for Migraine!<br/> <i>1 document</i></p>        | <p><b>Day 1 Education</b><br/>                 Review the facts about migraine headaches<br/> <i>1 document/1 video</i></p>                     | <p><b>Day 2 Education</b><br/>                 Understand migraine medications<br/> <i>1 document</i></p>                                     | <p><b>Day 4 Education</b><br/>                 Know how to treat a migraine attack<br/> <i>1 document</i></p>            |
|             | <p><b>Day 6 Education</b><br/>                 Identify your triggers<br/> <i>1 document</i></p>                                    | <p><b>Day 8 Education</b><br/>                 Count your sleep to prevent migraines<br/> <i>1 document</i></p>                                 | <p><b>Day 10 Education</b><br/>                 Stay hydrated to stop migraines<br/> <i>1 document</i></p>                                    | <p><b>Day 12 Education</b><br/>                 Check your eating habits to prevent migraines<br/> <i>1 document</i></p> |
|             | <p><b>Day 14 Education</b><br/>                 Watch your daily routine to avoid migraines<br/> <i>1 document</i></p>              | <p><b>Day 16 Education</b><br/>                 Get moving to avoid migraines<br/> <i>1 document</i></p>                                        | <p><b>Day 18 Education</b><br/>                 Manage stress for migraine relief<br/> <i>1 document</i></p>                                  | <p><b>Day 20 Education</b><br/>                 Plan ahead to avoid migraine triggers<br/> <i>1 document</i></p>         |
|             | <p><b>Day 22 Education</b><br/>                 Understand complementary therapies for migraine<br/> <i>1 document</i></p>          | <p><b>Day 24 Education</b><br/> <b>Women 18-50 only</b><br/>                 Learn about menstrual migraines<br/> <i>1 document/1 video</i></p> | <p><b>Day 26 Education</b><br/> <i>Repeat from Day 4*</i><br/>                 Know how to treat a migraine attack<br/> <i>1 document</i></p> | <p><b>Day 30 Education</b><br/>                 Learn about rebound headaches<br/> <i>1 document</i></p>                 |

## Medication check-in QNR0001

8/23/2019

QUES0001  
In the past week, did you take your migraine medication as prescribed?

|     |    |
|-----|----|
| Yes | No |
|-----|----|

QUES0002  
Do you have any concerns about your migraine medication?

No Concerns

I need a medication refill

ESC0016  
Notify the care team

QUES0010  
Which medication do you need refilled?

FREE TEXT

QUES0011  
Please provide the name of your preferred pharmacy for refill, with city and state:

FREE TEXT

Other: Free Text

ESC0013  
Notify the care team

QUES0012  
Describe your concern:

FREE TEXT

I'm worried about running out of medication

ESC0010  
Notify the care team

I'm worried about costs or insurance coverage of medication

ESC0011  
Notify the care team

I'm worried about rebound headaches

ESC0014  
Education

I'm having side effects from taking medication

ESC0015  
Message to patient

I have questions about my migraine medication

ESC0012  
Notify the care team

## Migraine management satisfaction QNR002 and QNR003

8/23/2019

QRN002 has no Escalations

QUES0003

How satisfied are you with the plan for managing your migraine?

Very satisfied

Satisfied

Neutral

Dissatisfied

ESC0004  
Notify the care team

Very dissatisfied

ESC0003  
Notify the care team

## Migraine Disability Assessment (MIDAS) QNR004

8/23/2019

QUES0004

On how many days in the last 3 months did you miss work or school because of your headaches?

Value of 0-90,  
pop up if outside of range

QUES0005

How many days in the last 3 months was your productivity at work or school reduced by half or more because of your headaches? (Do not include days counted in question 1 where you missed work or school.)

Value of 0-90,  
pop up if outside of range

QUES0006

On how many days in the last 3 months did you not do household work because of your headaches?

Value of 0-90,  
pop up if outside of range

QUES0007

How many days in the last 3 months was your productivity in household work reduced by half or more because of your headaches? (Do not include days you counted in question 3 where you did not do household work.)

Value of 0-90,  
pop up if outside of range

QUES0008

On how many days in the last 3 months did you miss family, social or leisure activities because of your headaches?

Value of 0-90,  
pop up if outside of range

Patient inputs from QNR0004 should be totaled and be able to present to provider a total MIDAS Score.

## Care plan check-in QNR005

8/23/2019

QUES0009

Would you like to continue on this care plan and complete weekly check-ins?

Yes

ESC0019  
Notify care team

No

ESC0009  
Notify care team

No response  
after 5 days

ESC0020  
Notify care team

## Migraine check-in GROUPER as 1 TASK

Used so patients can see progress over time - All to present at 1 time to patient 8/23/2019

### FLO0001

In the past week, how many days did you have a headache, even if it was mild?  
(If headache lasted more than one day, count each day.)

**Score 3-7**  
**ESC0001**  
Weeks 1-6

**Score 3-7**  
**ESC0002**  
Week 7-til end

### FLO0002

In the past week, how many days did you treat headache with acute pain medications? (Include over-the-counter and prescription pain relievers.)

### FLO0003

In the past week, how many days did you miss work or school because of headaches?

### FLO0004

In the past week, how many days was your productivity reduced at work or school because of headaches?

Pop up if not  
working or  
school use 0

### FLO0005

In the past week, how many days did headaches reduce your joy in social or leisure activities?

Free numeric text  
Minimum: 0  
Maximum: 7  
Pop up if outside of range
